# Supplementary material for: Cyclic Diguanylate Regulates Virulence Factor Genes via Multiple Riboswitches in Clostridium difficile
Source: mSphere. 2018 Oct 24;3(5):e00423-18. doi: 10.1128/mSphere.00423-18 (PMC6200980; doi:10.1128/mSphere.00423-18)
Supplement: FIG S3 [file sph005182673sf3.pdf]

| Accession     | Strain/Description                                | Riboswitch |     |     |     |     |     |     |     |     |      |      |      |     |     |     |     | 1-3  | 2-1  | 2-2  |
|---------------|---------------------------------------------------|------------|-----|-----|-----|-----|-----|-----|-----|-----|------|------|------|-----|-----|-----|-----|------|------|------|
|               |                                                   | 1-1        | 1-2 | 1-3 | 1-4 | 1-5 | 1-6 | 1-7 | 1-8 | 1-9 | 1-10 | 1-11 | 1-12 | 2-1 | 2-2 | 2-3 | 2-4 | 0245 | 3246 | 3267 |
| CP011968.1    | Clostridioides difficile ATCC 9689 = DSM 1296     |            |     |     |     |     |     |     |     |     |      |      |      |     |     |     |     |      |      |      |
| CP003939.1    | Clostridioides difficile BJ08                     |            |     |     |     |     |     |     |     |     |      |      |      |     |     |     |     |      |      |      |
| NZ_CP026594.1 | Clostridioides difficile strain 08-00495          |            |     |     |     |     |     |     |     |     |      |      |      |     |     |     |     |      |      |      |
| NZ_CP010888.1 | Clostridioides difficile strain 08ACD0030         |            |     |     |     |     |     |     |     |     |      |      |      |     |     |     |     |      |      |      |
| NZ_CP026599.1 | Clostridioides difficile strain 09-00072          |            |     |     |     |     |     |     |     |     |      |      |      |     |     |     |     |      |      |      |
| NZ_CP026596.1 | Clostridioides difficile strain 10-00071          |            |     |     |     |     |     |     |     |     |      |      |      |     |     |     |     |      |      |      |
| NZ_CP026597.1 | Clostridioides difficile strain 10-00078          |            |     |     |     |     |     |     |     |     |      |      |      |     |     |     |     |      |      |      |
| NZ_CP026598.1 | Clostridioides difficile strain 10-00253          |            |     |     |     |     |     |     |     |     |      |      |      |     |     |     |     |      |      |      |
| NZ_CP026593.1 | Clostridioides difficile strain 12-00008          |            |     |     |     |     |     |     |     |     |      |      |      |     |     |     |     |      |      |      |
| NZ_CP026595.1 | Clostridioides difficile strain 12-00011          |            |     |     |     |     |     |     |     |     |      |      |      |     |     |     |     |      |      |      |
| NZ_CP016318.1 | Clostridioides difficile strain 630 delta erm     |            |     |     |     |     |     |     |     |     |      |      |      |     |     |     |     |      |      |      |
| NZ_CP019870.1 | Clostridioides difficile strain BR81              |            |     |     |     |     |     |     |     |     |      |      |      |     |     |     |     |      |      |      |
| NZ_CP026592.1 | Clostridioides difficile strain CD-10-00484       |            |     |     |     |     |     |     |     |     |      |      |      |     |     |     |     |      |      |      |
| NZ_CP029154.1 | Clostridioides difficile strain CD161             |            |     |     |     |     |     |     |     |     |      |      |      |     |     |     |     |      |      |      |
| NZ_CP026591.1 | Clostridioides difficile strain CD-17-01474       |            |     |     |     |     |     |     |     |     |      |      |      |     |     |     |     |      |      |      |
| NZ_CP029152.1 | Clostridioides difficile strain CDT4              |            |     |     |     |     |     |     |     |     |      |      |      |     |     |     |     |      |      |      |
| NZ_CP022524.1 | Clostridioides difficile strain DH/NAP11H06/ST-42 |            |     |     |     |     |     |     |     |     |      |      |      |     |     |     |     |      |      |      |
| NZ_CP020378.1 | Clostridioides difficile strain DSM 102859        |            |     |     |     |     |     |     |     |     |      |      |      |     |     |     |     |      |      |      |
| NZ_CP020379.1 | Clostridioides difficile strain DSM 102860        |            |     |     |     |     |     |     |     |     |      |      |      |     |     |     |     |      |      |      |
| NZ_CP020380.1 | Clostridioides difficile strain DSM 102978        |            |     |     |     |     |     |     |     |     |      |      |      |     |     |     |     |      |      |      |
| NZ_CP011846.1 | Clostridioides difficile strain DSM 27638         |            |     |     |     |     |     |     |     |     |      |      |      |     |     |     |     |      |      |      |
| NZ_CP011847.1 | Clostridioides difficile strain DSM 27639         |            |     |     |     |     |     |     |     |     |      |      |      |     |     |     |     |      |      |      |
| NZ_CP011848.1 | Clostridioides difficile strain DSM 27640         |            |     |     |     |     |     |     |     |     |      |      |      |     |     |     |     |      |      |      |
| NZ_CP012320.1 | Clostridioides difficile strain DSM 28196         |            |     |     |     |     |     |     |     |     |      |      |      |     |     |     |     |      |      |      |
| NZ_CP012321.1 | Clostridioides difficile strain DSM 28666         |            |     |     |     |     |     |     |     |     |      |      |      |     |     |     |     |      |      |      |
| NZ_CP012309.1 | Clostridioides difficile strain DSM 28668         |            |     |     |     |     |     |     |     |     |      |      |      |     |     |     |     |      |      |      |
| NZ_CP012323.1 | Clostridioides difficile strain DSM 28669         |            |     |     |     |     |     |     |     |     |      |      |      |     |     |     |     |      |      |      |
| NZ_CP012312.1 | Clostridioides difficile strain DSM 28670         |            |     |     |     |     |     |     |     |     |      |      |      |     |     |     |     |      |      |      |
| NZ_CP012325.1 | Clostridioides difficile strain DSM 29020         |            |     |     |     |     |     |     |     |     |      |      |      |     |     |     |     |      |      |      |
| NZ_CP016102.1 | Clostridioides difficile strain DSM 29627         |            |     |     |     |     |     |     |     |     |      |      |      |     |     |     |     |      |      |      |
| NZ_CP016104.1 | Clostridioides difficile strain DSM 29629         |            |     |     |     |     |     |     |     |     |      |      |      |     |     |     |     |      |      |      |
| NZ_CP019860.1 | Clostridioides difficile strain DSM 29632         |            |     |     |     |     |     |     |     |     |      |      |      |     |     |     |     |      |      |      |
| NZ_CP016106.1 | Clostridioides difficile strain DSM 29637         |            |     |     |     |     |     |     |     |     |      |      |      |     |     |     |     |      |      |      |
| NZ_CP019858.1 | Clostridioides difficile strain DSM 29688         |            |     |     |     |     |     |     |     |     |      |      |      |     |     |     |     |      |      |      |
| NZ_CP019857.1 | Clostridioides difficile                          |            |     |     |     |     |     |     |     |     |      |      |      |     |     |     |     |      |      |      |

| Accession     | Strain/Description                                 | Riboswitch |     |     |     |     |     |     |     |     |      |      |      |     |     |     |     | 1-3  | 2-1  | 2-2  |
|---------------|----------------------------------------------------|------------|-----|-----|-----|-----|-----|-----|-----|-----|------|------|------|-----|-----|-----|-----|------|------|------|
|               |                                                    | 1-1        | 1-2 | 1-3 | 1-4 | 1-5 | 1-6 | 1-7 | 1-8 | 1-9 | 1-10 | 1-11 | 1-12 | 2-1 | 2-2 | 2-3 | 2-4 | 0245 | 3246 | 3267 |
| CP011968.1    | Clostridioides difficile ATCC 9689 = DSM 1296      |            |     |     |     |     |     |     |     |     |      |      |      |     |     |     |     |      |      |      |
| CP003939.1    | Clostridioides difficile BJ08                      |            |     |     |     |     |     |     |     |     |      |      |      |     |     |     |     |      |      |      |
| NZ_CP026594.1 | Clostridioides difficile strain 08-00495           |            |     |     |     |     |     |     |     |     |      |      |      |     |     |     |     |      |      |      |
| NZ_CP010888.1 | Clostridioides difficile strain 08ACD0030          |            |     |     |     |     |     |     |     |     |      |      |      |     |     |     |     |      |      |      |
| NZ_CP026599.1 | Clostridioides difficile strain 09-00072           |            |     |     |     |     |     |     |     |     |      |      |      |     |     |     |     |      |      |      |
| NZ_CP026596.1 | Clostridioides difficile strain 10-00071           |            |     |     |     |     |     |     |     |     |      |      |      |     |     |     |     |      |      |      |
| NZ_CP026597.1 | Clostridioides difficile strain 10-00078           |            |     |     |     |     |     |     |     |     |      |      |      |     |     |     |     |      |      |      |
| NZ_CP026598.1 | Clostridioides difficile strain 10-00253           |            |     |     |     |     |     |     |     |     |      |      |      |     |     |     |     |      |      |      |
| NZ_CP026593.1 | Clostridioides difficile strain 12-00008           |            |     |     |     |     |     |     |     |     |      |      |      |     |     |     |     |      |      |      |
| NZ_CP026595.1 | Clostridioides difficile strain 12-00011           |            |     |     |     |     |     |     |     |     |      |      |      |     |     |     |     |      |      |      |
| NZ_CP016318.1 | Clostridioides difficile strain 630 delta erm      |            |     |     | 100 | 100 |     |     |     |     |      |      |      |     |     |     |     |      |      |      |
| NZ_CP019870.1 | Clostridioides difficile strain BR81               |            |     |     |     |     |     |     |     |     |      |      |      |     |     |     |     |      |      |      |
| NZ_CP026592.1 | Clostridioides difficile strain CD-10-00484        |            |     |     |     |     |     |     |     |     |      |      |      |     |     |     |     |      |      |      |
| NZ_CP029154.1 | Clostridioides difficile strain CD161              |            |     |     | 99  | 99  |     |     |     |     |      |      |      |     |     |     |     |      |      |      |
| NZ_CP026591.1 | Clostridioides difficile strain CD-17-01474        |            |     |     |     |     |     |     |     |     |      |      |      |     |     |     |     |      |      |      |
| NZ_CP029152.1 | Clostridioides difficile strain CDT4               |            |     |     |     |     |     |     |     |     |      |      |      |     |     |     |     |      |      |      |
| NZ_CP022524.1 | Clostridioides difficile strain DH/NAP11/106/ST-42 |            |     |     |     |     |     |     |     |     |      |      |      |     |     |     |     |      |      |      |
| NZ_CP020378.1 | Clostridioides difficile strain DSM 102859         |            |     |     |     |     |     |     |     |     |      |      |      |     |     |     |     |      |      |      |
| NZ_CP020379.1 | Clostridioides difficile strain DSM 102860         |            |     |     |     |     |     |     |     |     |      |      |      |     |     |     |     |      |      |      |
| NZ_CP020380.1 | Clostridioides difficile strain DSM 102978         |            |     |     |     |     |     |     |     |     |      |      |      |     |     |     |     |      |      |      |
| NZ_CP011846.1 | Clostridioides difficile strain DSM 27638          |            |     |     |     |     |     |     |     |     |      |      |      |     |     |     |     |      |      |      |
| NZ_CP011847.1 | Clostridioides difficile strain DSM 27639          |            |     |     |     |     |     |     |     |     |      |      |      |     |     |     |     |      |      |      |
| NZ_CP011848.1 | Clostridioides difficile strain DSM 27640          |            |     |     |     |     |     |     |     |     |      |      |      |     |     |     |     |      |      |      |
| NZ_CP012320.1 | Clostridioides difficile strain DSM 28196          |            |     |     |     |     |     |     |     |     |      |      |      |     |     |     |     |      |      |      |
| NZ_CP012321.1 | Clostridioides difficile strain DSM 28666          |            |     |     |     |     |     |     |     |     |      |      |      |     |     |     |     |      |      |      |
| NZ_CP012309.1 | Clostridioides difficile strain DSM 28668          |            |     |     |     |     |     |     |     |     |      |      |      |     |     |     |     |      |      |      |
| NZ_CP012323.1 | Clostridioides difficile strain DSM 28669          |            |     |     |     |     |     |     |     |     |      |      |      |     |     |     |     |      |      |      |
| NZ_CP012312.1 | Clostridioides difficile strain DSM 28670          |            |     |     |     |     |     |     |     |     |      |      |      |     |     |     |     |      |      |      |
| NZ_CP012325.1 | Clostridioides difficile strain DSM 29020          |            |     |     |     |     |     |     |     |     |      |      |      |     |     |     |     |      |      |      |
| NZ_CP016102.1 | Clostridioides difficile strain DSM 29627          |            |     |     |     |     |     |     |     |     |      |      |      |     |     |     |     |      |      |      |
| NZ_CP016104.1 | Clostridioides difficile strain DSM 29629          |            |     |     |     |     |     |     |     |     |      |      |      |     |     |     |     |      |      |      |
| NZ_CP019860.1 | Clostridioides difficile strain DSM 29632          |            |     |     |     |     |     |     |     |     |      |      |      |     |     |     |     |      |      |      |
| NZ_CP016106.1 | Clostridioides difficile strain DSM 29637          |            |     |     |     |     |     |     |     |     |      |      |      |     |     |     |     |      |      |      |
| NZ_CP019858.1 | Clostridioides difficile strain DSM 29688          |            |     |     |     |     |     |     |     |     |      |      |      |     |     |     |     |      |      |      |
| NZ_CP019857.1 | Clostridioides difficile strain DSM 29745          |            |     |     |     |     |     |     |     |     |      |      |      |     |     |     |     |      |      |      |
| NZ_CP019864.1 | Clostridioides difficile strain DSM 29747          |            |     |     |     |     |     |     |     |     |      |      |      |     |     |     |     |      |      |      |
| NZ_CP020424.2 | Clostridioides difficile strain FDAARGOS_267       |            |     |     |     |     |     |     |     |     |      |      |      |     |     |     |     |      |      |      |
| CP019469.1    | Clostridioides difficile strain LEM1               |            |     |     |     |     |     |     |     |     |      |      |      |     |     |     |     |      |      |      |
| NZ_CP025044.1 | Clostridioides difficile strain R0104a             |            |     |     |     |     |     |     |     |     |      |      |      |     |     |     |     |      |      |      |
| NZ_CP026613.2 | Clostridioides difficile strain R1                 |            |     |     |     |     |     |     |     |     |      |      |      |     |     |     |     |      |      |      |
| NZ_CP026614.2 | Clostridioides difficile strain R2                 |            |     |     |     |     |     |     |     |     |      |      |      |     |     |     |     |      |      |      |
| NZ_CP026615.2 | Clostridioides difficile strain R3                 |            |     |     |     |     |     |     |     |     |      |      |      |     |     |     |     |      |      |      |
| NZ_CP025047.1 | Clostridioides difficile strain w'0003a            |            |     |     |     |     |     |     |     |     |      |      |      |     |     |     |     |      |      |      |
| NZ_CP025046.1 | Clostridioides difficile strain w'0022a            |            |     |     |     |     |     |     |     |     |      |      |      |     |     |     |     |      |      |      |
| NZ_CP025045.1 | Clostridioides difficile strain w'0023a            |            |     |     |     |     |     |     |     |     |      |      |      |     |     |     |     |      |      |      |
| CP013196.1    | Clostridioides difficile strain Z31                |            |     |     |     |     |     |     |     |     |      |      |      |     |     |     |     |      |      |      |
| NC_009080.1   | Clostridium difficile 630                          |            |     |     |     |     |     |     |     |     |      |      |      |     |     |     |     |      |      |      |
| FN668941.1    | Clostridium difficile BI1                          |            |     |     |     |     |     |     |     |     |      |      |      |     |     |     |     |      |      |      |
| NC_013315.1   | Clostridium difficile CD196                        |            |     |     |     |     |     |     |     |     |      |      |      |     |     |     |     |      |      |      |
| FN665654.1    | Clostridium difficile strain 2007855               |            |     |     |     |     |     |     |     |     |      |      |      |     |     |     |     |      |      |      |
| FN665652.1    | Clostridium difficile CF5                          |            |     |     |     |     |     |     |     |     |      |      |      |     |     |     |     |      |      |      |
| NC_017174.1   | Clostridium difficile M120                         |            |     |     |     |     |     |     |     |     |      |      |      |     |     |     |     |      |      |      |
| FN668375.1    | Clostridium difficile M68                          |            |     |     |     |     |     |     |     |     |      |      |      |     |     |     |     |      |      |      |
| FN545816.1    | Clostridium difficile R20291                       |            |     |     |     |     |     |     |     |     |      |      |      |     |     |     |     |      |      |      |
