# Supplementary material for: Cyclic Diguanylate Regulates Virulence Factor Genes via Multiple Riboswitches in Clostridium difficile
Source: PubMed Central journal article supplement (PMC6200980; doi:10.1128/msphere.00423-18), 2018-10-24

Figure S2

Cdi-1-4

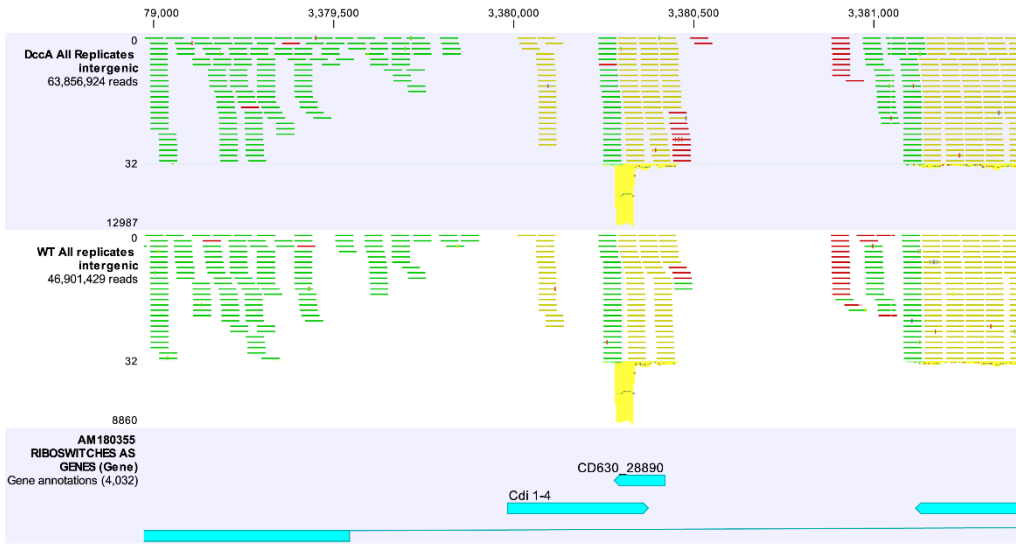

Cdi-1-5

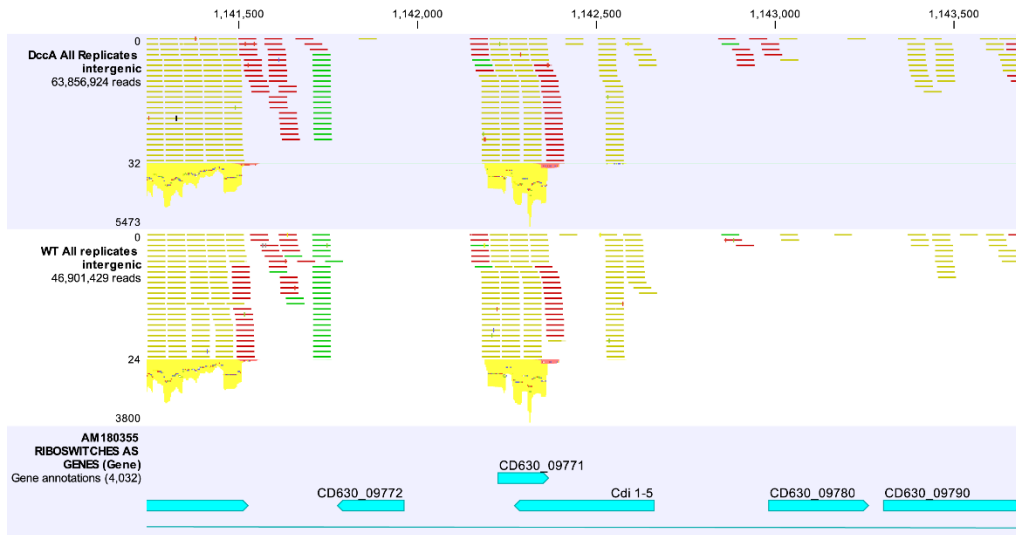

Cdi-1-6

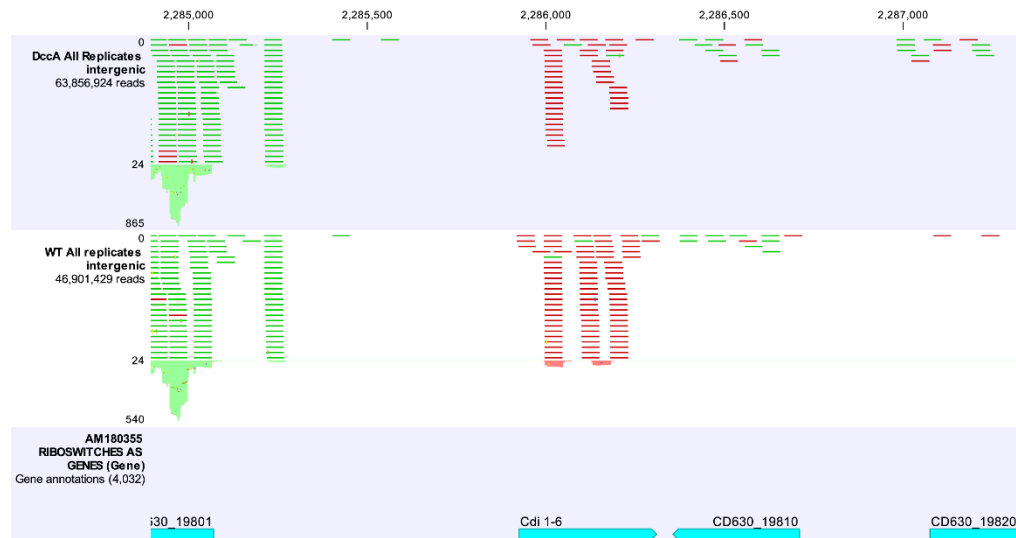

### Cdi-1-7

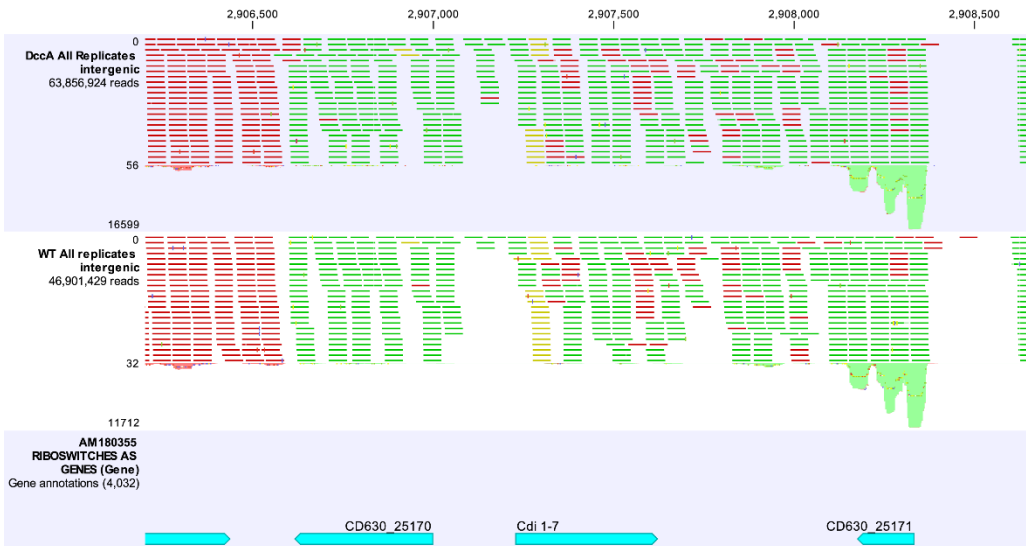

### Cdi-1-10

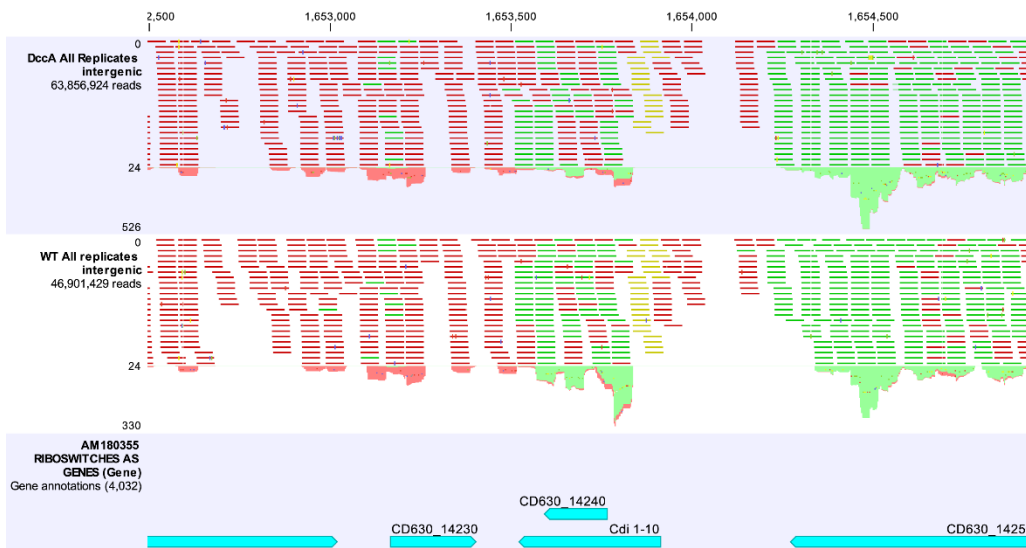

Supplement: sph005182673sf2.pdf [file sph005182673sf2.pdf]
