# Supplementary material for: Cyclic Diguanylate Regulates Virulence Factor Genes via Multiple Riboswitches in Clostridium difficile
Source: PubMed Central journal article supplement (PMC6200980; doi:10.1128/msphere.00423-18), 2018-10-24

Figure S5

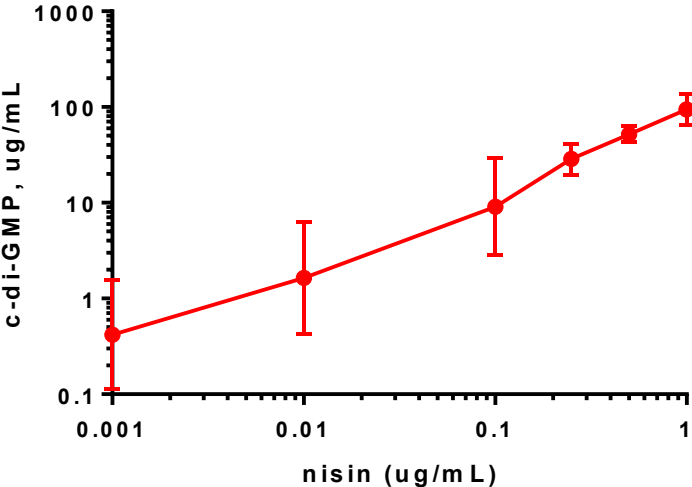

Supplement: sph005182673sf5.pdf [file sph005182673sf5.pdf]
