# Supplementary material for: Cyclic Diguanylate Regulates Virulence Factor Genes via Multiple Riboswitches in Clostridium difficile
Source: PubMed Central journal article supplement (PMC6200980; doi:10.1128/msphere.00423-18), 2018-10-24
Supplement: sph005182673st1.pdf [file sph005182673st1.pdf]

Table S1

| Lab Notation | Strain/Plasmid Name                                                        | Description                                                                                                                                                                                    | Reference      |
|--------------|----------------------------------------------------------------------------|------------------------------------------------------------------------------------------------------------------------------------------------------------------------------------------------|----------------|
|              | <i>Escherichia coli</i> DH5 $\alpha$                                       | F- $\phi$ 80 <i>lacZ</i> $\Delta$ M15 $\Delta$ ( <i>lacZYA-argF</i> )U169 <i>recA1 endA1 hsdR17</i> ( <i>rk -</i> , <i>mk+</i> ) <i>phoA supE44 thi-1 gyrA96 relA1</i> $\lambda$ - <i>tonA</i> | Invitrogen [1] |
| RT275        | <i>Bacillus subtilis</i> BS49                                              | CU2189::Tn916                                                                                                                                                                                  | [2, 3]         |
| RT694        | <i>C. difficile</i> 630 $\Delta$ erm                                       | Ribotype 012, erythromycin-sensitive derivative of <i>C. difficile</i> 630                                                                                                                     | [4]            |
| RT762        | <i>C. difficile</i> 630 $\Delta$ erm pMC123::P <i>cpr</i>                  | 630 $\Delta$ erm with control vector                                                                                                                                                           | [5]            |
| RT763        | <i>C. difficile</i> 630 $\Delta$ erm pDccA                                 | Strain contains plasmid with the diguanylate cyclase gene <i>dccA</i> under the control of the nisin-inducible <i>cpr</i> promoter                                                             | [5]            |
| RT764        | <i>C. difficile</i> 630 $\Delta$ erm pDccA <sup>mut</sup>                  | Strain contains plasmid with <i>dccA</i> allele encoding enzymatically inactive diguanylate cyclase gene under the control of the nisin-inducible <i>cpr</i> promoter                          | [5]            |
| RT2224       | 630 $\Delta$ erm pMC- <i>Ptet</i>                                          | Contains control plasmid                                                                                                                                                                       | This work      |
| RT2225       | 630 $\Delta$ erm pCD1987                                                   | Expresses putative adhesion under the control of <i>Ptet</i>                                                                                                                                   | This work      |
| RT2226       | 630 $\Delta$ erm pCD2795                                                   | Expresses putative adhesion under the control of <i>Ptet</i>                                                                                                                                   | This work      |
| RT2227       | 630 $\Delta$ erm pCD2796                                                   | Expresses putative adhesion under the control of <i>Ptet</i>                                                                                                                                   | This work      |
| RT2228       | 630 $\Delta$ erm pCD2797                                                   | Expresses putative adhesion under the control of <i>Ptet</i>                                                                                                                                   | This work      |
| RT2229       | 630 $\Delta$ erm pCD2831                                                   | Expresses putative adhesion under the control of <i>Ptet</i>                                                                                                                                   | This work      |
| RT2230       | 630 $\Delta$ erm pCD3246                                                   | Expresses putative adhesion under the control of <i>Ptet</i>                                                                                                                                   | This work      |
| RT2136       | 630 $\Delta$ erm pSMB47::P <sub>19900</sub> - <i>phoZ</i>                  | CD630_19900 promoter fused to <i>phoZ</i> and integrated on the <i>C. difficile</i> chromosome                                                                                                 | This work      |
| RT2137       | 630 $\Delta$ erm pSMB47::P <sub>19900</sub> - <i>phoZ</i> pMC-P <i>cpr</i> | RT2136 bearing control vector pMC-P <i>cpr</i>                                                                                                                                                 | This work      |
| RT2138       | 630 $\Delta$ erm pSMB47::P <sub>19900</sub> - <i>phoZ</i> pDccA            | RT2136 bearing pDccA                                                                                                                                                                           | This work      |
| RT2139       | 630 $\Delta$ erm pSMB47::P <sub>27970</sub> - <i>phoZ</i>                  | CD630_27970 promoter fused to <i>phoZ</i> and integrated on the <i>C. difficile</i> chromosome                                                                                                 | This work      |
| RT2140       | 630 $\Delta$ erm pSMB47::P <sub>27970</sub> - <i>phoZ</i> pMC-P <i>cpr</i> | RT2139 bearing control vector pMC-P <i>cpr</i>                                                                                                                                                 | This work      |
| RT2141       | 630 $\Delta$ erm pSMB47::P <sub>27970</sub> - <i>phoZ</i> pDccA            | RT2139 bearing pDccA                                                                                                                                                                           | This work      |
| RT2142       | 630 $\Delta$ erm pSMB47::P <sub>flgB</sub> - <i>phoZ</i>                   | <i>flgB</i> promoter fused to <i>phoZ</i> and integrated on the <i>C. difficile</i> chromosome                                                                                                 | This work      |
| RT2143       | 630 $\Delta$ erm pSMB47::P <sub>flgB</sub> - <i>phoZ</i> pMC-P <i>cpr</i>  | RT2142 bearing control vector pMC-P <i>cpr</i>                                                                                                                                                 | This work      |
| RT2144       | 630 $\Delta$ erm pSMB47::P <sub>flgB</sub> - <i>phoZ</i> pDccA             | RT2142 bearing pDccA                                                                                                                                                                           | This work      |
| RT2145       | 630 $\Delta$ erm pSMB47::P <sub>19903</sub> - <i>phoZ</i>                  | CD630_19903 promoter fused to <i>phoZ</i> and integrated on the <i>C. difficile</i> chromosome                                                                                                 | This work      |
| RT2146       | 630 $\Delta$ erm pSMB47::P <sub>19903</sub> - <i>phoZ</i> pMC-P <i>cpr</i> | RT2145 bearing control vector pMC-P <i>cpr</i>                                                                                                                                                 | This work      |
| RT2147       | 630 $\Delta$ erm pSMB47::P <sub>19903</sub> - <i>phoZ</i> pDccA            | RT2145 bearing pDccA                                                                                                                                                                           | This work      |
| RT2148       | 630 $\Delta$ erm pSMB47::P <sub>23090</sub> - <i>phoZ</i>                  | CD630_23090 promoter fused to <i>phoZ</i> and integrated on the <i>C. difficile</i> chromosome                                                                                                 | This work      |
| RT2149       | 630 $\Delta$ erm pSMB47::P <sub>23090</sub> - <i>phoZ</i> pMC-P <i>cpr</i> | RT2148 bearing control vector pMC-P <i>cpr</i>                                                                                                                                                 | This work      |
| RT2150       | 630 $\Delta$ erm pSMB47::P <sub>23090</sub> - <i>phoZ</i> pDccA            | RT2148 bearing pDccA                                                                                                                                                                           | This work      |
| RT2151       | 630 $\Delta$ erm pSMB47::P <sub>33682</sub> - <i>phoZ</i>                  | CD630_33682 promoter fused to <i>phoZ</i> and integrated on the <i>C. difficile</i> chromosome                                                                                                 | This work      |

|        |                                                                       |                                                                                                                                      |                  |
|--------|-----------------------------------------------------------------------|--------------------------------------------------------------------------------------------------------------------------------------|------------------|
| RT2152 | 630Δerm pSMB47::P <sub>33682</sub> - <i>phoZ</i> pMC-Pcpr             | RT2151 bearing control vector pMC-Pcpr                                                                                               | This work        |
| RT2153 | 630Δerm pSMB47::P <sub>33682</sub> - <i>phoZ</i> pDccA                | RT2151 bearing pDccA                                                                                                                 | This work        |
| RT2154 | 630Δerm pSMB47::P <sub>zmpl</sub> - <i>phoZ</i>                       | <i>zmpl</i> promoter fused to <i>phoZ</i> and integrated on the <i>C. difficile</i> chromosome                                       | This work        |
| RT2155 | 630Δerm pSMB47::P <sub>zmpl</sub> - <i>phoZ</i> pMC-Pcpr              | RT2154 bearing control vector pMC-Pcpr                                                                                               | This work        |
| RT2156 | 630Δerm pSMB47::P <sub>zmpl</sub> - <i>phoZ</i> pDccA                 | RT2154 bearing pDccA                                                                                                                 | This work        |
| RT2157 | 630Δerm pSMB47::P <sub>32460</sub> - <i>phoZ</i>                      | CD630_32460 promoter fused to <i>phoZ</i> and integrated on the <i>C. difficile</i> chromosome                                       | This work        |
| RT2158 | 630Δerm pSMB47::P <sub>32460</sub> - <i>phoZ</i> pMC-Pcpr             | RT2157 bearing control vector pMC-Pcpr                                                                                               | This work        |
| RT2159 | 630Δerm pSMB47::P <sub>32460</sub> - <i>phoZ</i> pDccA                | RT2157 bearing pDccA                                                                                                                 | This work        |
| RT2160 | 630Δerm pSMB47::P <sub>32670</sub> - <i>phoZ</i>                      | CD630_32670 promoter fused to <i>phoZ</i> and integrated on the <i>C. difficile</i> chromosome                                       | This work        |
| RT2161 | 630Δerm pSMB47::P <sub>32670</sub> - <i>phoZ</i> pMC-Pcpr             | RT2160 bearing control vector pMC-Pcpr                                                                                               | This work        |
| RT2162 | 630Δerm pSMB47::P <sub>32670</sub> - <i>phoZ</i> pDccA                | RT2160 bearing pDccA                                                                                                                 | This work        |
| RT2163 | 630Δerm pSMB47::P <sub>28310</sub> - <i>phoZ</i>                      | CD630_28310 promoter fused to <i>phoZ</i> and integrated on the <i>C. difficile</i> chromosome                                       | This work        |
| RT2164 | 630Δerm pSMB47::P <sub>28310</sub> - <i>phoZ</i> pMC-Pcpr             | RT2163 bearing control vector pMC-Pcpr                                                                                               | This work        |
| RT2165 | 630Δerm pSMB47::P <sub>28310</sub> - <i>phoZ</i> pDccA                | RT2163 bearing pDccA                                                                                                                 | This work        |
| RT2166 | 630Δerm pSMB47::P <sub>pilA1</sub> - <i>phoZ</i>                      | <i>pilA1</i> promoter fused to <i>phoZ</i> and integrated on the <i>C. difficile</i> chromosome                                      | This work        |
| RT2167 | 630Δerm pSMB47::P <sub>pilA1</sub> - <i>phoZ</i> pMC-Pcpr             | RT2166 bearing control vector pMC-Pcpr                                                                                               | This work        |
| RT2168 | 630Δerm pSMB47::P <sub>pilA1</sub> - <i>phoZ</i> pDccA                | RT2166 bearing pDccA                                                                                                                 | This work        |
| RT2169 | 630Δerm pSMB47::P <sub>pilA1</sub> -UTR- <i>phoZ</i>                  | <i>pilA1</i> promoter and native riboswitch fused to <i>phoZ</i> and integrated on the <i>C. difficile</i> chromosome                | This work        |
| RT2170 | 630Δerm pSMB47::P <sub>pilA1</sub> -UTR- <i>phoZ</i>                  | RT2169 bearing control vector pMC-Pcpr                                                                                               | This work        |
| RT2171 | 630Δerm pSMB47::P <sub>pilA1</sub> -UTR- <i>phoZ</i>                  | RT2169 bearing pDccA                                                                                                                 | This work        |
| RT2172 | 630Δerm pSMB47::P <sub>pilA1</sub> -UTR <sup>A70G</sup> - <i>phoZ</i> | <i>pilA1</i> promoter with A70G mutation in the riboswitch fused to <i>phoZ</i> and integrated on the <i>C. difficile</i> chromosome | This work        |
| RT2173 | 630Δerm pSMB47::P <sub>pilA1</sub> -UTR <sup>A70G</sup> - <i>phoZ</i> | RT2172 bearing control vector pMC-Pcpr                                                                                               | This work        |
| RT2174 | 630Δerm pSMB47::P <sub>pilA1</sub> -UTR <sup>A70G</sup> - <i>phoZ</i> | RT2172 bearing pDccA                                                                                                                 | This work        |
|        |                                                                       |                                                                                                                                      |                  |
|        | <b>Plasmid Name</b>                                                   | <b>Description</b>                                                                                                                   | <b>Reference</b> |
| RT264  | pMC123                                                                | <i>E. coli</i> – <i>C. difficile</i> shuttle vector; Amp <sup>R</sup> , Cm <sup>R</sup> /Tm <sup>R</sup>                             | [6]              |
| RT399  | pMC-P <sub>cpr</sub>                                                  | pMC123 with <i>cpr</i> promoter in the multiple cloning site                                                                         | [5]              |
| RT402  | pDccA                                                                 | pMC-P <sub>cpr</sub> :: <i>dccA</i> (CD630_14200), encodes DGC                                                                       | [5]              |
| RT529  | pDccA <sup>mut</sup>                                                  | pMC-P <sub>cpr</sub> :: <i>dccA</i> <sup>mut</sup> (AADEF), encodes inactive DGC                                                     | [5]              |
| RT1648 | pMC-P <sub>tet</sub>                                                  | pMC123 with <i>tet</i> promoter                                                                                                      | This work        |

|        |                                                             |                                                                                                       |           |
|--------|-------------------------------------------------------------|-------------------------------------------------------------------------------------------------------|-----------|
| RT1649 | pCD1987                                                     | pMC-P <sub>tet</sub> ::CD630_19870, putative adhesion under the control of the <i>tet</i> promoter    | This work |
| RT1650 | pCD2795                                                     | pMC-P <sub>tet</sub> ::CD630_27950, putative adhesion under the control of the <i>tet</i> promoter    | This work |
| RT1651 | pCD2796                                                     | pMC-P <sub>tet</sub> ::CD630_27960, putative adhesion under the control of the <i>tet</i> promoter    | This work |
| RT1652 | pCD2797                                                     | pMC-P <sub>tet</sub> ::CD630_27970, putative adhesion under the control of the <i>tet</i> promoter    | This work |
| RT1653 | pCD2831                                                     | pMC-P <sub>tet</sub> ::CD630_28310, putative adhesion under the control of the <i>tet</i> promoter    | This work |
| RT1654 | pCD3246                                                     | pMC-P <sub>tet</sub> ::CD630_32460, putative adhesion under the control of the <i>tet</i> promoter    | This work |
| RT2060 | pSMB47::P <sub>19900</sub> :: <i>phoZ</i>                   | CD630_19900 putative promoter fused to <i>phoZ</i>                                                    | This work |
| RT2061 | pSMB47::P <sub>27970</sub> :: <i>phoZ</i>                   | CD630_19900 putative promoter fused to <i>phoZ</i>                                                    | This work |
| RT2062 | pSMB47::P <sub>flgB</sub> :: <i>phoZ</i>                    | CD630_02450 <i>flgB</i> promoter region fused to <i>phoZ</i>                                          | This work |
| RT2063 | pSMB47::P <sub>19903</sub> :: <i>phoZ</i>                   | CD630_19903 putative promoter fused to <i>phoZ</i>                                                    | This work |
| RT2064 | pSMB47::P <sub>23090</sub> :: <i>phoZ</i>                   | CD630_23090 putative promoter fused to <i>phoZ</i>                                                    | This work |
| RT2065 | pSMB47::P <sub>33682</sub> :: <i>phoZ</i>                   | CD630_33682 putative promoter fused to <i>phoZ</i>                                                    | This work |
| RT2066 | pSMB47::P <sub>zmp1</sub> :: <i>phoZ</i>                    | CD630_23800 putative promoter fused to <i>phoZ</i>                                                    | This work |
| RT2067 | pSMB47::P <sub>32460</sub> :: <i>phoZ</i>                   | CD630_32460 putative promoter fused to <i>phoZ</i>                                                    | This work |
| RT2068 | pSMB47::P <sub>32670</sub> :: <i>phoZ</i>                   | CD630_32670 putative promoter fused to <i>phoZ</i>                                                    | This work |
| RT2069 | pSMB47::P <sub>23810</sub> :: <i>phoZ</i>                   | CD630_23810 putative promoter fused to <i>phoZ</i>                                                    | This work |
| RT2070 | pSMB47::P <sub>pilA1</sub> :: <i>phoZ</i>                   | CD630_35130 <i>pilA1</i> promoter region fused to <i>phoZ</i>                                         | This work |
| RT2114 | pSMB47::P <sub>pilA1-UTR</sub> - <i>phoZ</i>                | <i>pilA1</i> promoter and native UTR containing the wildtype riboswitch sequence fused to <i>phoZ</i> | This work |
| RT2115 | pSMB47::P <sub>pilA1-UTR<sup>A70G</sup></sub> - <i>phoZ</i> | <i>pilA1</i> promoter and UTR with A70G mutation in the riboswitch sequence fused to <i>phoZ</i>      | This work |

## References

1. Hanahan, D., Studies on transformation of *Escherichia coli* with plasmids. J Mol Biol, 1983. **166**(4): p. 557-80.
2. Christie, P.J., et al., Two conjugation systems associated with *Streptococcus faecalis* plasmid pCF10: identification of a conjugative transposon that transfers between *S. faecalis* and *Bacillus subtilis*. J Bacteriol, 1987. **169**(6): p. 2529-36.
3. Browne, H.P., et al., Complete genome sequence of BS49 and draft genome sequence of BS34A, *Bacillus subtilis* strains carrying Tn916. FEMS Microbiol Lett, 2015. **362**(3): p. 1-4.
4. Hussain, H.A., A.P. Roberts, and P. Mullany, Generation of an erythromycin-sensitive derivative of *Clostridium difficile* strain 630 (630Deltaerm) and demonstration that the conjugative transposon Tn916DeltaE enters the genome of this strain at multiple sites. J Med Microbiol, 2005. **54**(Pt 2): p. 137-141.
5. Purcell, E.B., et al., Cyclic diguanylate inversely regulates motility and aggregation in *Clostridium difficile*. J Bacteriol, 2012. **194**(13): p. 3307-3316.
6. McBride, S.M. and A.L. Sonenshein, Identification of a genetic locus responsible for antimicrobial peptide resistance in *Clostridium difficile*. Infect Immun, 2011. **79**(1): p. 167-176.
