# Supplementary material for: Cyclic Diguanylate Regulates Virulence Factor Genes via Multiple Riboswitches in Clostridium difficile
Source: PubMed Central journal article supplement (PMC6200980; doi:10.1128/msphere.00423-18), 2018-10-24
Supplement: sph005182673st2.pdf [file sph005182673st2.pdf]

Table S2

| Lab Notation | Primer name                | Sequence (5' to 3') <sup>a</sup>                                 |
|--------------|----------------------------|------------------------------------------------------------------|
| R1931        | Atc_F                      | TTAGAATTCCATAAAAAATAAGAAGCCTGCATTTG                              |
| R1932        | Atc_R                      | TTAGAGCTCAGATCTGTAAACGC                                          |
| R1933        | CD630_19870_F              | TTAGAGCTCGTAAAGGAGAAAAATTTTATGAAATTCTATAAAAAGAATATTAACATTGAC     |
| R1934        | CD630_19870_R              | TATGGATCCACAATTACATCTATTCAATTTCAATTAATAAC                        |
| R1935        | CD630_27950_F              | AATGGATCCGTAAAGGAGAAAAATTTTATGAACAAAAAATATTATCATTAGGTCTAG        |
| R1936        | CD630_27950_R              | TATCTGCAGTTTATGGAATTTTTACAAGCTACC                                |
| R1937        | CD630_27960_F              | AATGAGCTCGTAAAGGAGAAAAATTTTATGAATAAAAGAAAATCTTTATAAGAACTATAG     |
| R1938        | CD630_27960_R              | TATGGATCCATTTATTTTTCAATTAAACTCTTAATCTTGTC                        |
| R1939        | CD630_27970_F              | AATGAGCTCGTAAAGGAGAAAAATTTTATGAAAAGGCAATATCTTGTGTAC              |
| R1940        | CD630_27970_R              | TATGGATCCACCTACTATTTATCTCTAACAATATTACC                           |
| R1941        | CD630_28310_F              | AATGAGCTCGTAAAGGAGAAAAATTTTATGAAGAAAGGAAATAGAAAGGC               |
| R1942        | CD630_28310_R              | TATGGATCCTAATGTTAGGGTCTAATTTGTATTTTTATTTT                        |
| R1943        | CD630_32460_F              | AATGAGCTCGTAAAGGAGAAAAATTTTTGAAAACAAAAATTAATAAATCAAGTATAATC      |
| R1944        | CD630_32460_R              | TATGGATCCAGATTAATTTCTTTTTATTTTACATTGATACG                        |
| R2482        | Cdi1-1promF                | AGGCTCTCAAGGGCATCGGTGCGACTGTTATATATTGAAAATGTTGAAAAATAGCC         |
| R2483        | Cdi1-1promR                | ATTCCTTGTTTCCTCCTGCATGCTTTGCCTATATCTGAATAATAACATAATTTGAAC        |
| R2484        | Cdi1-2promF                | AGGCTCTCAAGGGCATCGGTGCGACAAAATATACACAAAATTATGCTTGTAAAGG          |
| R2485        | Cdi1-2promR                | ATTCCTTGTTTCCTCCTGCATGCTGCCATTTAATTTTCACTACTTTCTTAC              |
| R2486        | Cdi1-3promF                | AGGCTCTCAAGGGCATCGGTGCGACGTAAAAGACAAATTTAGAATAAATTTATTTTATATTG   |
| R2487        | Cdi1-3promR                | ATTCCTTGTTTCCTCCTGCATGCATTTGCCTATTTAGTTTTAACTTAAGTATAC           |
| R2488        | Cdi1-8promF                | AGGCTCTCAAGGGCATCGGTGCGACTCTGGTAATTTTTATTTAGCATAATATATTCC        |
| R2489        | Cdi1-8promR                | ATTCCTTGTTTCCTCCTGCATGCTGCCGATTTAGTTTTATTCTACAAC                 |
| R2490        | Cdi1-9promF                | AGGCTCTCAAGGGCATCGGTGCGACTTTTGCATTATTAATAATGTGTTTTAAATACAAC      |
| R2491        | Cdi1-9promR                | ATTCCTTGTTTCCTCCTGCATGCAGTTTTGCCGATTTAGTTTTATTCTAC               |
| R2492        | Cdi1-11promF               | AGGCTCTCAAGGGCATCGGTGCGACTCAATTTATCTCACTTAAATTAATAACAACCTG       |
| R2493        | Cdi1-11promR               | ATTCCTTGTTTCCTCCTGCATGCTGCCGATTTAGTTTTATTCTACAATTAC              |
| R2494        | Cdi1-12promF               | AGGCTCTCAAGGGCATCGGTGCGACAAGAAGAAAATAAAAATACAATTAGACCC           |
| R2495        | Cdi1-12promR               | ATTCCTTGTTTCCTCCTGCATGCCCTAGTTTTGCCTCATTTAATTTTATATC             |
| R2496        | Cdi2-1promF                | AGGCTCTCAAGGGCATCGGTGCGACATAATGATACTCAAGTATGTGGTTTG              |
| R2497        | Cdi2-1promR                | ATTCCTTGTTTCCTCCTGCATGCACAGTTTCTATAAATAGGTTTTTAATTTTTT           |
| R2498        | Cdi2-2promF                | AGGCTCTCAAGGGCATCGGTGCGACACAAGAGTTATAATATAAAGTAAACATATAATACC     |
| R2499        | Cdi2-2promR                | ATTCCTTGTTTCCTCCTGCATGCTAAAAATCTTTTATATATTTTCATAAATTTCTTTTTTATTC |
| R2500        | Cdi2-3promF                | AGGCTCTCAAGGGCATCGGTGCGACATATAATTGTGTAATTGTTGTAGATAAGG           |
| R2501        | Cdi2-3promR                | ATTCCTTGTTTCCTCCTGCATGCTCTATAATTTTCATAAAAACAATTAATAATTGC         |
| R2502        | Cdi2-4promF                | AGGCTCTCAAGGGCATCGGTGCGACTTTCAAATAAATATTAGCAAAGGATGG             |
| R2503        | Cdi2-4promR                | ATTCCTTGTTTCCTCCTGCATGCAACACTGTTTATACTATTTATATATACCAAC           |
| R2504        | CD630_19900qF              | ACTACAATCCCTGATGG                                                |
| R2505        | CD630_19900qR              | ACTTAAATGCTCTTCTATGTA                                            |
| R2506        | CD630_19903qF              | GCTTATATTAGCAGTTCGT                                              |
| R2507        | CD630_19903qR              | CAATACCATTACTTGGTGTA                                             |
| R2508        | CD630_23090qF              | ACTGCTTATATTGGTAGTTC                                             |
| R2509        | CD630_23090qR              | TGATGCAAGCAAGATTC                                                |
| R2510        | CD630_33682qR <sup>b</sup> | CTTGATGCAAACAAGATTC                                              |
| R2511        | CD630_28300qF              | GATGATGTTCCAGGTTTAG                                              |
| R2512        | CD630_28300qR              | CTATTGCATGTGCTGTT                                                |
| R2513        | CD630_32460qF              | ATCAGATGGTCAGATACC                                               |
| R2514        | CD630_32460qR              | TATCTGATGTCTTCTCTCC                                              |
| R2515        | CD630_32670qF              | CCTGATATTGGAGATCAAC                                              |
| R2516        | CD630_32670qR              | CCCATACGTTTGAATG                                                 |
| R856         | CD0245qF ( <i>flgB</i> )   | GCAACTAATCTAAGAAGTCAGACAATAGC                                    |
| R857         | CD0245qR ( <i>flgB</i> )   | AGGCATAGCATCATTTAGTGTTCCTC                                       |

|      |          |                            |
|------|----------|----------------------------|
| R930 | CD3513qF | TGGCAGTTCCAGCTTTATTTAGTAAT |
| R931 | CD3513qR | AAGATAATGCTGCACTCTTAAGTAA  |
| R850 | rpoCqF   | CTAGCTGCTCCTATGTCTCACATC   |
| R851 | rpoCqR   | CCAGTCTCTCCTGGATCAACTA     |

<sup>a</sup> Restriction sites used for cloning are underlined

<sup>b</sup> Use with RT2507 as the forward primer
