# Supplementary material for: Cyclic Diguanylate Regulates Virulence Factor Genes via Multiple Riboswitches in Clostridium difficile
Source: PubMed Central journal article supplement (PMC6200980; doi:10.1128/msphere.00423-18), 2018-10-24
Supplement: sph005182673st3.pdf [file sph005182673st3.pdf]

Table S3

| Locus Tag Identifier | Gene Name    | Gene Product                                                           | Fold Change (pDccA/vector) <sup>a</sup> | Riley Functional Class <sup>b</sup> |
|----------------------|--------------|------------------------------------------------------------------------|-----------------------------------------|-------------------------------------|
| CD630_01300          | <i>metK</i>  | S-adenosylmethionine synthetase                                        | -2.15                                   | 3.3.16                              |
| CD630_01480          |              | uncharacterised protein                                                | -4.40                                   | 7.0.0                               |
| CD630_01740          | <i>cooS</i>  | Carbon monoxide dehydrogenase                                          | -8.61                                   | 3.5.2                               |
| CD630_01750          |              | putative oxidoreductase, Fe-S subunit                                  | -5.15                                   | 3.5.3                               |
| CD630_01910          |              | putative DNA glycosylase                                               | -2.06                                   | 2.2.3                               |
| CD630_02110          | <i>licC</i>  | CTP:phosphocholine cytidyltransferase                                  | -10.96                                  | 4.1.9                               |
| CD630_02120          |              | putative sulfatase                                                     | -9.03                                   | 3.3.19                              |
| CD630_02130          |              | putative spore coat protein                                            | -4.79                                   | 1.8.1                               |
| CD630_02140          |              | uncharacterised protein                                                | -5.77                                   | 7.0.0                               |
| CD630_02260          |              | putative lytic transglycosylase                                        | -6.05                                   | 3.3.21                              |
| CD630_02270          |              | conserved hypothetical protein                                         | -5.77                                   | 0.0.2                               |
| CD630_02290          | <i>flgM</i>  | Negative regulator of flagellin synthesis (Anti-sigma-d factor)        | -5.49                                   | 6.2.2                               |
| CD630_02300          |              | putative flagellar biosynthesis protein                                | -5.56                                   | 1.1.1                               |
| CD630_02310          | <i>flgK</i>  | Flagellar hook-associated protein FlgK (or HAP1)                       | -5.53                                   | 1.1.1                               |
| CD630_02320          | <i>flgL</i>  | Flagellar hook-associated protein FlgL (or HAP3)                       | -5.68                                   | 1.1.1                               |
| CD630_02330          | <i>fliW</i>  | Flagellar assembly factor FliW                                         | -5.93                                   | 1.1.1                               |
| CD630_02340          | <i>csrA</i>  | Carbon storage regulator CsrA                                          | -5.99                                   | 6.5.0                               |
| CD630_02350          | <i>fliS1</i> | Flagellar protein FliS1                                                | -6.01                                   | 1.1.1                               |
| CD630_02360          | <i>fliS2</i> | Flagellar protein FliS2                                                | -6.03                                   | 1.1.1                               |
| CD630_02370          | <i>fliD</i>  | Flagellar hook-associated protein 2 FliD (or HAP2)                     | -6.45                                   | 1.1.1                               |
| CD630_02380          |              | conserved hypothetical protein                                         | -6.76                                   | 0.0.2                               |
| CD630_02390          | <i>fliC</i>  | Flagellin C                                                            | -7.85                                   | 1.1.1                               |
| CD630_02400          |              | Glycosyltransferase                                                    | -5.71                                   | 2.2.4                               |
| CD630_02410          |              | flagella glycosylation phosphoserine phosphatase                       | -5.88                                   | 2.2.4                               |
| CD630_02420          |              | putative nucleoside triphosphate transferase                           | -5.92                                   | 2.2.4                               |
| CD630_02430          |              | flagella glycosylation methyltransferase domain protein                | -5.96                                   | 2.2.4                               |
| CD630_02440          |              | putative CDP-glycerol:Poly(glycerophosphate) glycerophosphotransferase | -5.89                                   | 2.2.4                               |
| CD630_02450          | <i>flgB</i>  | Flagellar basal-body rod protein FlgB                                  | -15.09                                  | 1.1.1                               |
| CD630_02460          | <i>flgC</i>  | Flagellar basal-body rod protein FlgC                                  | -14.93                                  | 1.1.1                               |
| CD630_02470          | <i>fliE</i>  | Flagellar hook-basal body complex protein FliE                         | -15.47                                  | 1.1.1                               |
| CD630_02480          | <i>fliF</i>  | Flagellar M-ring protein FliF                                          | -13.28                                  | 1.1.1                               |
| CD630_02490          | <i>fliG</i>  | Flagellar motor switch protein FliG                                    | -12.07                                  | 1.1.1                               |
| CD630_02500          | <i>fliH</i>  | Flagellar assembly protein FliH                                        | -11.00                                  | 1.1.1                               |
| CD630_02510          | <i>fliI</i>  | ATP synthase subunit beta FliI                                         | -11.23                                  | 1.1.1                               |
| CD630_02520          | <i>fliJ</i>  | Flagellar protein FliJ                                                 | -11.73                                  | 1.1.1                               |
| CD630_02530          | <i>fliK</i>  | Flagellar hook-length control protein FliK                             | -11.30                                  | 1.1.1                               |
| CD630_02540          | <i>flgD</i>  | Basal-body rod modification protein FlgD                               | -11.76                                  | 1.1.1                               |
| CD630_02550          | <i>flgE</i>  | Flagellar hook protein FlgE (Distal rod protein)                       | -11.68                                  | 1.1.1                               |
| CD630_02551          | <i>FliD</i>  | Flagellar protein FliD                                                 | -12.10                                  | 1.1.1                               |
| CD630_02560          | <i>motA</i>  | Flagellar motor rotation protein MotA                                  | -11.53                                  | 1.1.1                               |
| CD630_02570          | <i>motB</i>  | Flagellar motor rotation protein MotB (Chemotaxis protein MotB)        | -11.45                                  | 1.1.1                               |
| CD630_02580          | <i>fliL</i>  | Flagellar basal body-associated protein FliL                           | -11.51                                  | 1.1.1                               |
| CD630_02590          | <i>fliZ</i>  | Flagellar protein FliZ                                                 | -11.37                                  | 1.1.1                               |
| CD630_02600          | <i>fliP</i>  | Flagellar biosynthesis protein FliP                                    | -10.76                                  | 1.1.1                               |
| CD630_02610          | <i>fliQ</i>  | Flagellar biosynthetic protein FliQ                                    | -11.10                                  | 1.1.1                               |
| CD630_02620          | <i>fliB</i>  | Bifunctional flagellar biosynthesis protein FliR/FliB                  | -10.25                                  | 1.1.1                               |
| CD630_02630          | <i>fliA</i>  | Flagellar biosynthesis protein FliA                                    | -10.14                                  | 1.1.1                               |

|             |              |                                                                                                                       |        |        |
|-------------|--------------|-----------------------------------------------------------------------------------------------------------------------|--------|--------|
| CD630_02640 | <i>flhF</i>  | Flagellar biosynthesis regulator FlhF (Flagella-associated GTP-binding protein)                                       | -9.89  | 1.1.1  |
| CD630_02650 | <i>flhG</i>  | Flagellar number regulator FlhG                                                                                       | -9.76  | 1.1.1  |
| CD630_02660 | <i>fliA</i>  | RNA polymerase sigma-28factor for flagellar operon                                                                    | -9.94  | 6.2.1  |
| CD630_02670 |              | putative flagellar protein                                                                                            | -10.10 | 1.1.1  |
| CD630_02671 |              | putative flagellar protein                                                                                            | -11.82 | 1.1.1  |
| CD630_02680 | <i>flgG1</i> | Flagellar hook-basal body complex protein FlgG1                                                                       | -9.59  | 1.1.1  |
| CD630_02690 | <i>flgG</i>  | Flagellar basal body rod protein FlgG                                                                                 | -10.09 | 1.1.1  |
| CD630_02700 | <i>fliM</i>  | Flagellar motor switch protein FliM                                                                                   | -9.66  | 1.1.1  |
| CD630_02710 | <i>fliN1</i> | Flagellar motor switch phosphatase FliN1                                                                              | -5.85  | 1.1.1  |
| CD630_02280 | <i>fliN</i>  | Flagellar motor switch protein FliN                                                                                   | -10.19 | 1.1.1  |
| CD630_02720 |              | conserved hypothetical protein                                                                                        | -9.93  | 0.0.2  |
| CD630_02730 | <i>htpG</i>  | Heat shock protein 90 (Heat shock protein HtpG)(High temperature protein G)                                           | -4.17  | 1.3.1  |
| CD630_02731 |              | conserved hypothetical protein                                                                                        | -3.05  | 0.0.2  |
| CD630_02850 |              | PTS system, mannose/fructose/sorbose IIB component                                                                    | 2.75   | 1.5.3  |
| CD630_02860 |              | PTS system, mannose/fructose/sorbose IIA component                                                                    | 2.43   | 1.5.3  |
| CD630_02880 |              | PTS system, mannose/fructose/sorbose IIC component                                                                    | 2.84   | 1.5.3  |
| CD630_05110 | <i>tndX</i>  | Recombinase site-specific resolvase family Tn5397, CTn3-Orf3                                                          | -12.90 | 5.1.4  |
| CD630_05290 |              | putative membrane protein                                                                                             | -5.06  | 4.1.6  |
| CD630_05600 | <i>nfo</i>   | Endonuclease IV                                                                                                       | -5.33  | 2.2.3  |
| CD630_05800 | <i>gapN</i>  | Glyceraldehyde-3-phosphate dehydrogenase (NADP(+)) (GADPH)                                                            | -11.79 | 3.5.5  |
| CD630_05870 |              | uncharacterised protein                                                                                               | 2.02   | 7.0.0  |
| CD630_05880 |              | uncharacterised protein                                                                                               | 2.06   | 7.0.0  |
| CD630_06180 |              | Transcriptional regulator, LytR family                                                                                | -2.59  | 6.5.0  |
| CD630_06190 |              | conserved hypothetical protein                                                                                        | -7.92  | 0.0.2  |
| CD630_06200 |              | conserved hypothetical protein                                                                                        | -8.54  | 0.0.2  |
| CD630_06210 |              | putative membrane protein                                                                                             | -6.87  | 4.1.6  |
| CD630_06220 |              | conserved hypothetical protein                                                                                        | -7.09  | 0.0.2  |
| CD630_06720 |              | conserved hypothetical protein                                                                                        | -4.36  | 0.0.2  |
| CD630_07570 |              | putative c-di-GMP phosphodiesterase                                                                                   | -5.35  | 6.5.0  |
| CD630_10910 | <i>int1</i>  | Integrase Tn1549-like, CTn4-Orf34                                                                                     | 2.68   | 5.1.4  |
| CD630_11030 |              | putative conjugative transposon protein Tn1549-like, CTn4-Orf21                                                       | 4.91   | 5.1.4  |
| CD630_11031 |              | putative conjugative transposon protein Tn1549-like, CTn4-Orf20                                                       | 3.90   | 5.1.4  |
| CD630_11040 |              | putative conjugative transposon protein Tn1549-like, CTn4-Orf19                                                       | 3.03   | 5.1.4  |
| CD630_11250 |              | Nitroreductase-family protein                                                                                         | -6.05  | 7.0.0  |
| CD630_11260 |              | Transcriptional regulator, AraC family                                                                                | -4.61  | 6.3.2  |
| CD630_12790 | <i>iscS2</i> | Cysteine desulfurase                                                                                                  | -5.22  | 3.3.19 |
| CD630_12800 |              | fe-s iron-sulfur cluster assembly protein, nifu family                                                                | -3.54  | 3.5.3  |
| CD630_14700 |              | putative rhodanese-like domain-containing protein                                                                     | -19.49 | 1.4.2  |
| CD630_14740 |              | putative rubrerythrin (Rr)                                                                                            | -8.36  | 1.4.2  |
| CD630_14790 | <i>feoB1</i> | Ferrous iron transport protein B                                                                                      | 2.24   | 1.6.3  |
| CD630_15240 |              | putative rubrerythrin                                                                                                 | -2.56  | 1.4.2  |
| CD630_15680 |              | conserved hypothetical protein                                                                                        | -7.98  | 0.0.2  |
| CD630_15800 | <i>hom2</i>  | Homoserine dehydrogenase                                                                                              | 2.73   | 3.1.0  |
| CD630_16970 | <i>ribH</i>  | 6,7-dimethyl-8-ribityllumazine synthase                                                                               | -3.74  | 3.2.13 |
| CD630_16980 | <i>ribBA</i> | Riboflavin biosynthesis protein ribBA [Includes: 3,4-dihydroxy-2-butanone 4-phosphate synthase; GTP cyclohydrolase-2] | -2.74  | 3.2.13 |

|             |              |                                                                                                                        |        |        |
|-------------|--------------|------------------------------------------------------------------------------------------------------------------------|--------|--------|
| CD630_17290 |              | putative sodium:phosphate symporter                                                                                    | -9.01  | 1.5.2  |
| CD630_17770 |              | putative arsenate reductase                                                                                            | -5.61  | 1.4.2  |
| CD630_17940 |              | conserved hypothetical protein                                                                                         | 5.11   | 0.0.2  |
| CD630_17950 |              | conserved hypothetical protein                                                                                         | 5.76   | 0.0.2  |
| CD630_18220 | <i>bcp</i>   | putative thiol peroxidase                                                                                              | -13.15 | 1.4.2  |
| CD630_18230 |              | conserved hypothetical protein, UPF0246 family                                                                         | -10.41 | 0.0.2  |
| CD630_18240 |              | P-type calcium transport ATPase                                                                                        | -3.15  | 1.5.2  |
| CD630_18820 |              | Site-specific recombinase                                                                                              | -3.84  | 5.1.4  |
| CD630_18990 |              | putative dCMP deaminase                                                                                                | -13.88 | 7.0.0  |
| CD630_19870 | <i>cwp28</i> | putative cell wall binding protein cwp28                                                                               | 4.31   | 4.1.8  |
| CD630_19900 |              | putative protein with SH3 domain                                                                                       | 35.08  | 0.0.2  |
| CD630_19903 |              | conserved hypothetical protein                                                                                         | -2.00  | 0.0.2  |
| CD630_20460 |              | conserved hypothetical protein                                                                                         | -9.50  | 0.0.2  |
| CD630_21151 |              | uncharacterised protein                                                                                                | -11.51 | 7.0.0  |
| CD630_21170 | <i>trxB2</i> | Thioredoxin reductase                                                                                                  | -5.23  | 3.2.15 |
| CD630_21580 | <i>gabT</i>  | 4-aminobutyrate aminotransferase                                                                                       | 2.06   | 3.3.20 |
| CD630_22090 |              | putative GTP-binding protein, HflX type                                                                                | -4.09  | 7.0.0  |
| CD630_23090 |              | conserved hypothetical protein                                                                                         | -2.64  | 0.0.2  |
| CD630_23270 | <i>gatA</i>  | PTS system, fructose/mannitol family IIA component                                                                     | 5.32   | 1.5.3  |
| CD630_24760 |              | gnat family acetyltransferase                                                                                          | -3.38  | 7.0.0  |
| CD630_24770 |              | uncharacterised protein                                                                                                | -4.50  | 7.0.0  |
| CD630_24860 |              | PTS system, fructose-like IIC component                                                                                | -2.44  | 1.5.3  |
| CD630_24870 |              | PTS system, fructose-like IIB component                                                                                | -2.64  | 1.5.3  |
| CD630_24880 |              | PTS system, fructose-like IIA component                                                                                | -3.23  | 1.5.3  |
| CD630_24890 |              | Transcription antiterminator, PTS operon regulator                                                                     | -3.91  | 6.5.0  |
| CD630_27950 | <i>selA</i>  | L-seryl-tRNA(Sec) selenium transferase (Selenocysteine synthase) (Sec synthase) (Selenocysteinyl-tRNA (Sec) synthase ) | 2.89   | 2.2.1  |
| CD630_27960 | <i>selD</i>  | Selenide, water dikinase (Selenophosphate synthetase) (Selenium donor protein)                                         | -4.07  | 2.2.1  |
| CD630_27970 | <i>comE</i>  | Competence protein ComEA                                                                                               | -7.14  | 4.1.6  |
| CD630_28300 |              | uncharacterised protein                                                                                                | -65.96 | 7.0.0  |
| CD630_28310 |              | putative adhesin                                                                                                       | 42.42  | 4.1.5  |
| CD630_28410 |              | putative amidohydrolase                                                                                                | -11.37 | 3.4.5  |
| CD630_28450 | <i>rbr1</i>  | Rubrerythrin                                                                                                           | 2.50   | 1.4.2  |
| CD630_28460 |              | conserved hypothetical protein                                                                                         | 2.42   | 0.0.2  |
| CD630_28470 |              | conserved hypothetical protein                                                                                         | 2.38   | 0.0.2  |
| CD630_28480 |              | conserved hypothetical protein                                                                                         | 2.37   | 0.0.2  |
| CD630_28750 | <i>fhuC</i>  | ABC-type transport system, ferrichrome-specific ATP-binding protein                                                    | -3.78  | 1.6.3  |
| CD630_29950 | <i>nrdE</i>  | Ribonucleoside-diphosphate reductase subunit alpha (Ribonucleotide reductase large subunit)                            | -4.39  | 3.3.11 |
| CD630_30100 |              | putative cytochrome C assembly protein                                                                                 | -2.30  | 3.2.6  |
| CD630_30330 | <i>trxA1</i> | Thioredoxin                                                                                                            | -3.78  | 3.2.15 |
| CD630_30390 |              | putative ATPase                                                                                                        | -6.98  | 7.0.0  |
| CD630_30400 |              | conserved hypothetical protein                                                                                         | -10.44 | 0.0.2  |
| CD630_30990 |              | putative amidohydrolase, M20D family                                                                                   | -2.08  | 2.1.4  |
| CD630_31000 |              | putative C4-dicarboxylate anaerobic carrier, DcuC family                                                               | -2.09  | 1.5.3  |
| CD630_32110 |              | conserved hypothetical protein                                                                                         | 2.07   | 0.0.2  |
| CD630_32150 |              | ABC-type transport system, glycine betaine/carnitine/choline ATP-binding protein                                       | -5.74  | 1.6.2  |
| CD630_32160 |              | ABC-type transport system, glycine betaine/carnitine/choline permease                                                  | -8.39  | 1.6.2  |
| CD630_32460 |              | putative surface protein                                                                                               | 4.28   | 4.1.8  |

|             |                                                                             |        |        |
|-------------|-----------------------------------------------------------------------------|--------|--------|
| CD630_32640 | Fragment of conserved hypothetical protein (C-terminal region)              | 3.37   | 0.0.2  |
| CD630_32650 | Two-component response regulator                                            | 17.57  | 6.1.2  |
| CD630_32660 | Two-component sensor histidine kinase                                       | 18.37  | 6.1.1  |
| CD630_32670 | Two-component response regulator                                            | 18.74  | 6.1.2  |
| CD630_33230 | conserved hypothetical protein                                              | -2.25  | 0.0.2  |
| CD630_33250 | conserved hypothetical protein                                              | 2.10   | 0.0.2  |
| CD630_33260 | Integrase, lambdoid phage family Tn916-like, CTn6-Orf1                      | 2.14   | 5.1.2  |
| CD630_33270 | putative conjugative transposon protein Tn916-like, CTn6-Orf2               | 2.12   | 5.1.4  |
| CD630_34770 | putative dCMP deaminase                                                     | -2.00  | 3.3.11 |
| CD630_35040 | putative type IV prepilin peptidase, A24A family                            | 3.18   | 4.1.5  |
| CD630_35050 | putative twitching motility protein PilT                                    | 3.49   | 4.1.5  |
| CD630_35060 | conserved hypothetical protein                                              | 4.28   | 0.0.2  |
| CD630_35070 | putative type IV pilin                                                      | 4.40   | 4.1.5  |
| CD630_35080 | putative type IV pilin                                                      | 4.69   | 4.1.5  |
| CD630_35090 | putative type IV pilus assembly protein                                     | 4.67   | 4.1.5  |
| CD630_35100 | putative membrane protein                                                   | 5.08   | 4.1.6  |
| CD630_35110 | putative type IV pilus secretion protein                                    | 5.28   | 4.1.5  |
| CD630_35120 | putative type IV pilus transporter system, ATP-binding                      | 4.89   | 4.1.5  |
| CD630_35130 | putative pilin protein PilA1                                                | 11.72  | 4.1.5  |
| CD630_35250 | ABC-type transport system, iron-family extracellular solute-binding protein | -9.35  | 1.5.5  |
| CD630_35260 | ABC-type transport system, iron-family permease                             | -9.01  | 1.5.5  |
| CD630_35270 | ABC-type transport system, iron-family ATP-binding protein                  | -9.81  | 1.5.5  |
| CD630_36100 | putative glyoxalase                                                         | -11.82 | 1.4.2  |
| CD630_36400 | putative ribokinase family sugar kinase                                     | -2.01  | 3.4.3  |
| CD630_36410 | conserved hypothetical protein                                              | -4.38  | 0.0.2  |
| CD630_36420 | putative selenocysteine synthase                                            | -4.98  | 2.2.1  |
| CD630_36430 | Dihydroorotase                                                              | -5.02  | 3.7.2  |

<sup>a</sup> Shown are genes with at least 2-fold differential expression between *C. difficile* with vector and pDccA and meeting  $p < 0.05$  after Bonferroni's correction.

<sup>b</sup> Riley Class identification based on Pettit et al. BMC Genomics 2014.
